# Supplementary material for: Prion Aggregates Are Recruited to the Insoluble Protein Deposit (IPOD) via Myosin 2-Based Vesicular Transport
Source: PubMed Central journal article supplement (PMC5045159; doi:10.1371/journal.pgen.1006324), 2016-09-30

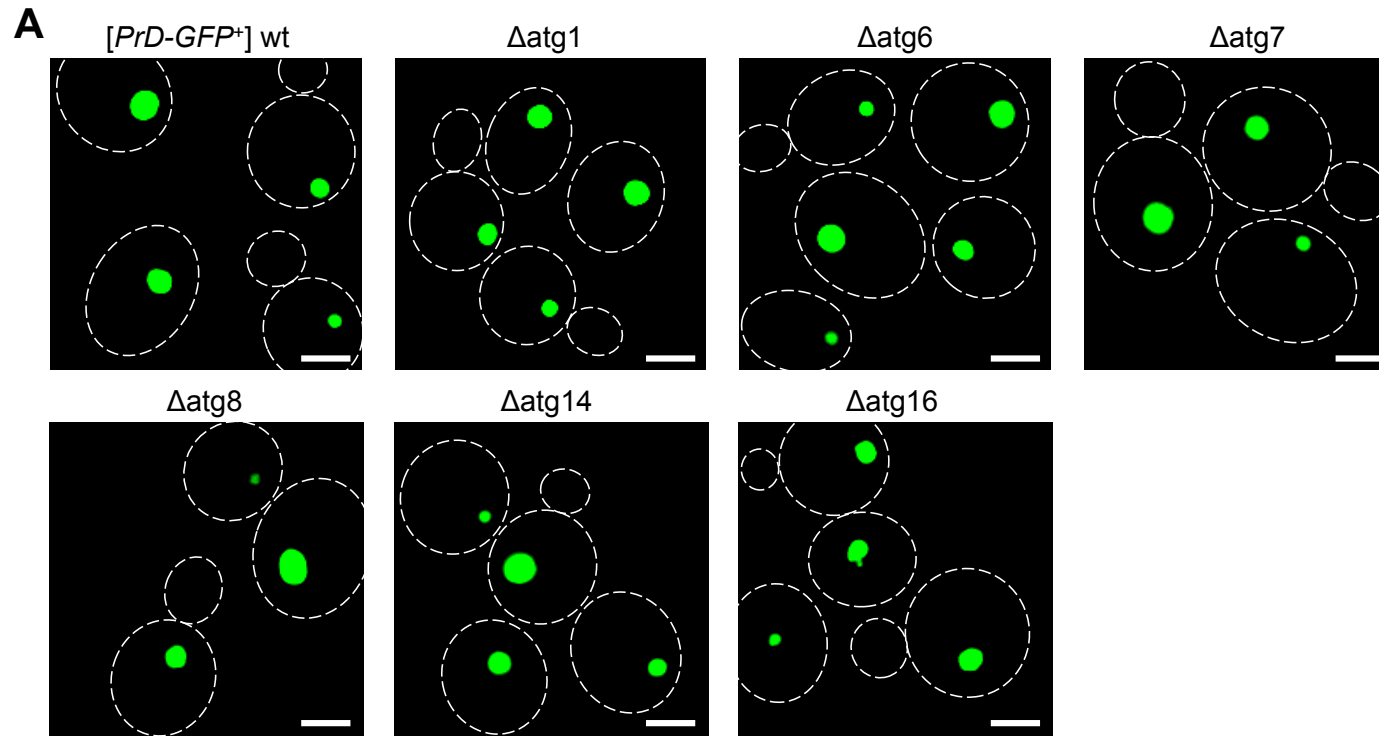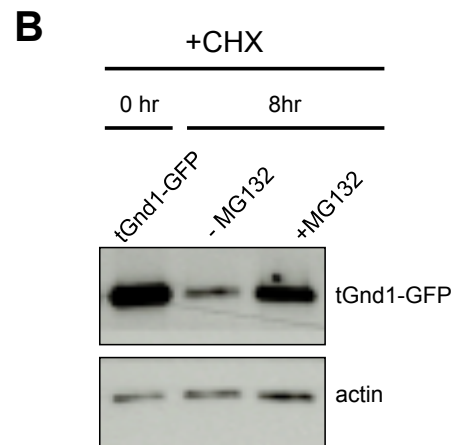

Supplement: pgen.1006324.s010.pdf [file pgen.1006324.s010.pdf]
