# Supplementary material for: Prion Aggregates Are Recruited to the Insoluble Protein Deposit (IPOD) via Myosin 2-Based Vesicular Transport
Source: PubMed Central journal article supplement (PMC5045159; doi:10.1371/journal.pgen.1006324), 2016-09-30
Supplement: pgen.1006324.s012.pdf [file pgen.1006324.s012.pdf]

**S2 Table: Strains used in this study**

| S.N. | NAME                    | GENOTYPE                                                  | SOURCE/REFERENCE |
|------|-------------------------|-----------------------------------------------------------|------------------|
| 1    | RK1                     | 74D-694-[ <i>PSI</i> <sup>+</sup> ]-Gal-PrD-GFP::LEU2     | (1)              |
| 2    | RK1a                    | RK1 tpm1Δ::natNT2                                         | This study       |
| 3    | RK1b                    | RK1a-OsTIR1::URA3                                         | This study       |
| 4    | RK1c                    | RK1b-TPM2-AID :: <i>kanMX4</i>                            | This study       |
| 5    | RK1d                    | RK1-OsTIR1::URA3                                          | This study       |
| 6    | RK1e                    | RK1d-MYO2-AID::kanMX4                                     | This study       |
| 7    | RK1g                    | RK1d-SEC18-AID::kanMX4                                    | This study       |
| 8    | RK1<br>atg9Δ            | RK1 atg9::hphNT1                                          | This study       |
| 9    | RK1<br>atg11Δ           | RK1 atg11::natNT2                                         | This study       |
| 10   | RK1<br>atg19Δ           | RK1 atg19::natNT2                                         | This study       |
| 11   | RK1<br>ape1Δ            | RK1 ape1::kanMX4                                          | This study       |
| 12   | RK1<br>ams1Δ            | RK1 ams1::kanMX4                                          | This study       |
| 13   | RK1<br>sgt2Δ            | RK1 sgt2::kanMX4                                          | This study       |
| 14   | RK1e +<br>pRFP-<br>ATG8 | RK1e + pRS414 RFP-ATG8                                    | This study       |
| 15   | RK1e<br>APE1-<br>mCh    | RK1e-303 APE1-mCh::HIS3                                   | This study       |
| 16   | RK1e<br>ATG9-<br>3xmCh  | RK1e-ATG9-3xmCh::hph NT1                                  | This study       |
| 17   | RK1g +<br>pmCh-<br>ATG8 | RK1g + pRS413 mCh-ATG8                                    | This study       |
| 18   | RK1g<br>MYO2-<br>3xmCh  | RK1g-MYO2-3xmCh::hph NT1                                  | This study       |
| 19   | RK3                     | 74D-694-ΔPrD (SUP35) [ <i>PrD-GFP</i> <sup>+</sup> ]:TRP1 | (1)              |
| 20   | RK3<br>TPM1-<br>mCh     | RK3-TPM1-mCh::hphNT1                                      | This study       |
| 21   | RK3<br>TPM2-<br>mCh     | RK3-TPM2-mCh::hphNT1                                      | This study       |
| 22   | RK3<br>atg1Δ            | RK3 atg1Δ::natNT2                                         | This study       |
| 23   | RK3<br>atg6Δ            | RK3 atg6Δ::natNT2                                         | This study       |
| 24   | RK3<br>atg7Δ            | RK3 atg7Δ::natNT2                                         | This study       |
| 25   | RK3                     | RK3 atg8Δ::natNT2                                         | This study       |

|    |                      |                                                                                  |            |
|----|----------------------|----------------------------------------------------------------------------------|------------|
|    | atg8Δ                |                                                                                  |            |
| 26 | RK3<br>atg14Δ        | RK3 atg14Δ::natNT2                                                               | This study |
| 27 | RK3<br>atg16Δ        | RK3 atg16Δ::natNT2                                                               | This study |
| 28 | RK3<br>pep4Δ         | RK3 pep4Δ::natNT2                                                                | This study |
| 29 | RK4                  | 74D-694-ΔPrD (SUP35) [ <i>prd-gfp</i> ]::TRP1                                    | (1)        |
| 30 | RK4<br>pep4Δ         | RK4 pep4Δ::natNT2                                                                | This study |
| 31 | 74D                  | 74D-694-[ <i>PSI</i> <sup>+</sup> ]                                              | (2)        |
| 32 | RK5a                 | 74D-OsTIR1::URA3                                                                 | This study |
| 33 | RK5b                 | RK5a-MYO2-AID::kanMX4                                                            | This study |
| 36 | RK5e                 | RK5b-GFP-preApe1::natNT2                                                         | This study |
| 37 | RK5f                 | RK5b-GFP-ATG8::natNT2                                                            | This study |
| 38 | RK5b<br>Rnq1-<br>GFP | RK5b-305 Gal RNQ1-GFP::LEU2                                                      | This study |
| 39 | RK5b<br>Ure2-YFP     | RK5b-305 Gal URE2-YFP::LEU2                                                      | This study |
| 40 | RK5b<br>103Q-<br>CFP | RK5b-304 Gal 103Q-CFP::TRP1                                                      | This study |
| 41 | RK6                  | 74D-305 Gal RNQ1-GFP::LEU2                                                       | This study |
| 42 | RK7                  | 74D-305 Gal URE2-YFP::LEU2                                                       | This study |
| 43 | RK8                  | 74D-304 Gal 103Q-CFP::TRP1                                                       | This study |
| 44 | RK1h                 | RK1d-SEC14-AID::kanMX4                                                           | This study |
| 45 | RK1i                 | RK1d-SEC21-AID::kanMX4                                                           | This study |
| 46 | RK1j                 | RK1d-SEC53-AID::kanMX4                                                           | This study |
| 47 | tGnd1-<br>GFP        | BY4741-tGnd1-GFP:: natNT2 Δ <i>prd5</i><br>::kanMX4                              | (3)        |
| 48 | RK1<br>Δ <i>prd5</i> | 74D-694-[ <i>PSI</i> <sup>+</sup> ]-Gal-PrD-GFP::LEU2<br>Δ <i>prd5</i> ::hph NT1 | This study |
| 49 | RK9                  | RK5b-304 Gal 103Q-CFP::TRP1-305 Gal<br>URE2-YFP::LEU2                            | This study |

1. Tyedmers J, Treusch S, Dong J, McCaffery JM, Bevis B, Lindquist S. Prion induction involves an ancient system for the sequestration of aggregated proteins and heritable changes in prion fragmentation. *Proceedings of the National Academy of Sciences of the United States of America*. 2010 May 11;107(19):8633-8. PubMed PMID: 20421488. Pubmed Central PMCID: 2889312.
2. Chernoff YO, Lindquist SL, Ono B, Inge-Vechtomov SG, Liebman SW. Role of the chaperone protein Hsp104 in propagation of the yeast prion-like factor [*psi*<sup>+</sup>]. *Science*. 1995 May 12;268(5212):880-4. PubMed PMID: 7754373. Epub 1995/05/12. eng.
3. Miller SB, Ho CT, Winkler J, Khokhrina M, Neuner A, Mohamed MY, et al. Compartment-specific aggregates direct distinct nuclear and cytoplasmic aggregate deposition. *The EMBO journal*. 2015 Mar 12;34(6):778-97. PubMed PMID: 25672362. Pubmed Central PMCID: 4369314.
